# Supplementary material
Source: PubMed Central journal article supplement (PMC5372351)

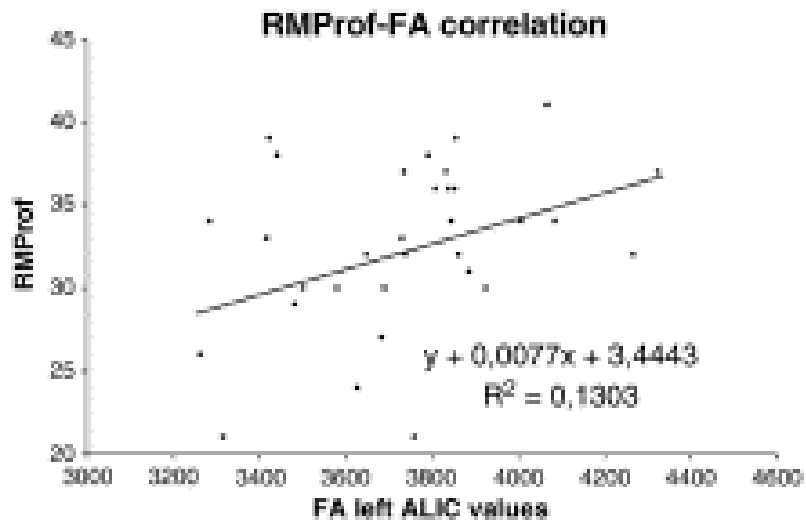

Supplementary Figure 1  
Regression between FA left ALIC values and Rivermead Profile scores

Supplement: NIHMS846303-supplement-Supplemental_Fig_1.pdf [file NIHMS846303-supplement-Supplemental_Fig_1.pdf]
